# Supplementary material for: Risk Factors for a False-Negative Result of Sentinel Node Biopsy in Patients with Clinically Node-Negative Breast Cancer
Source: PubMed Central journal article supplement — Cancer Res Treat. 2017 Jul 31;50(3):625–33. doi: 10.4143/crt.2017.089 (PMC6056988; doi:10.4143/crt.2017.089), 2017-07-31
Supplement: crt-2017-089-suppl2.pdf [file crt-2017-089-suppl2.pdf]

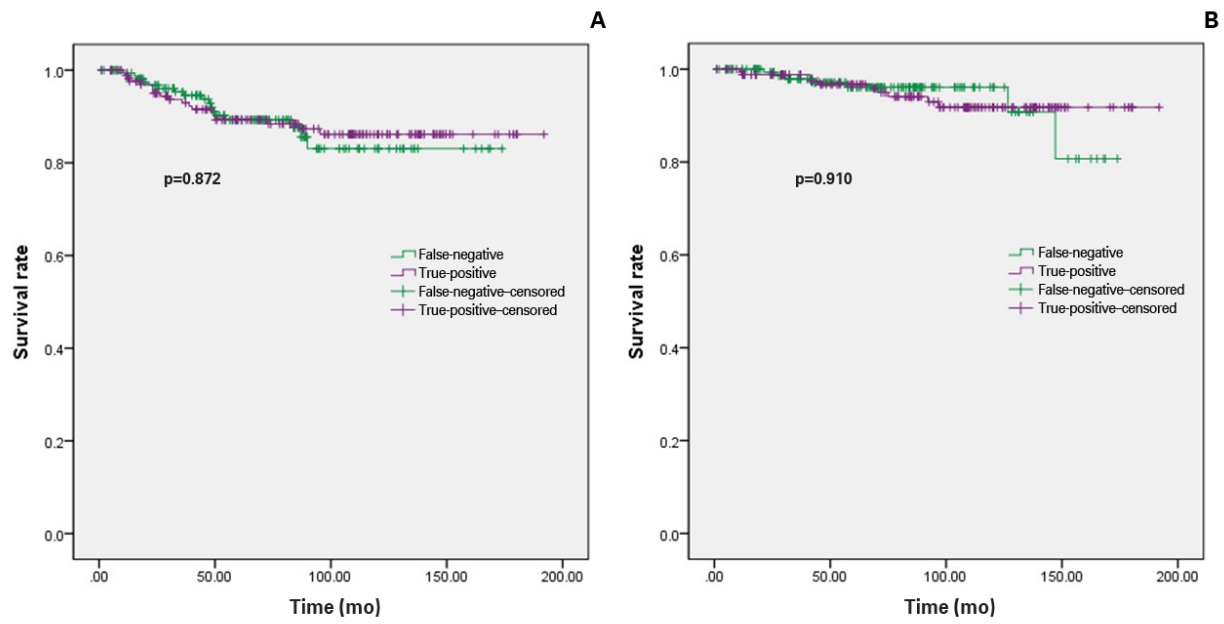

**S2 Fig.** Propensity score matched survival analysis between false-negative and true-positive group. (A) Disease-free survival analysis between true-positive and false-negative group. (B) Overall survival analysis between true-positive and false-negative group.
